# Supplementary material
Source: PubMed Central journal article supplement (PMC2751940)
Supplement: tpc.108.065193_1.pdf [file tpc.108.065193_1.pdf]

Supplemental Data Chen et al., (2009) ETHYLENE INSENSITIVE 3 and ETHYLENE INSENSITIVE 3-LIKE 1 repress *SID2* expression to negatively regulate plant innate immunity in Arabidopsis

**WT**

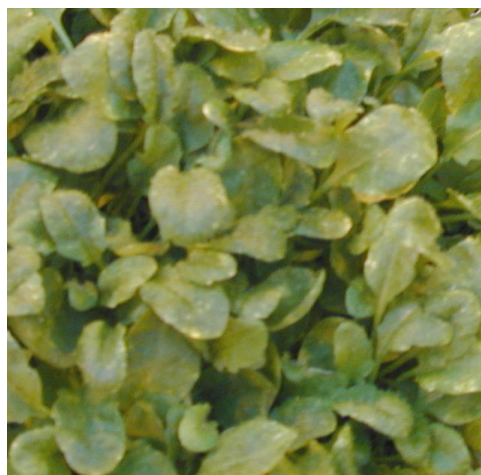

***ein3-4***

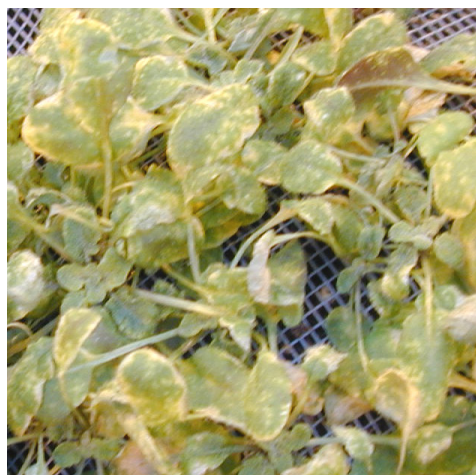

**Supplemental Figure 1.** Enhanced Disease Symptoms in *ein3-4* Plants.

WT *RAP2.6-LUC* transgenic and *ein3-4* plants were dip-inoculated with  $10^8$  CFU/mL DC3000 bacteria, and disease symptoms were photographed 4 days post inoculation.

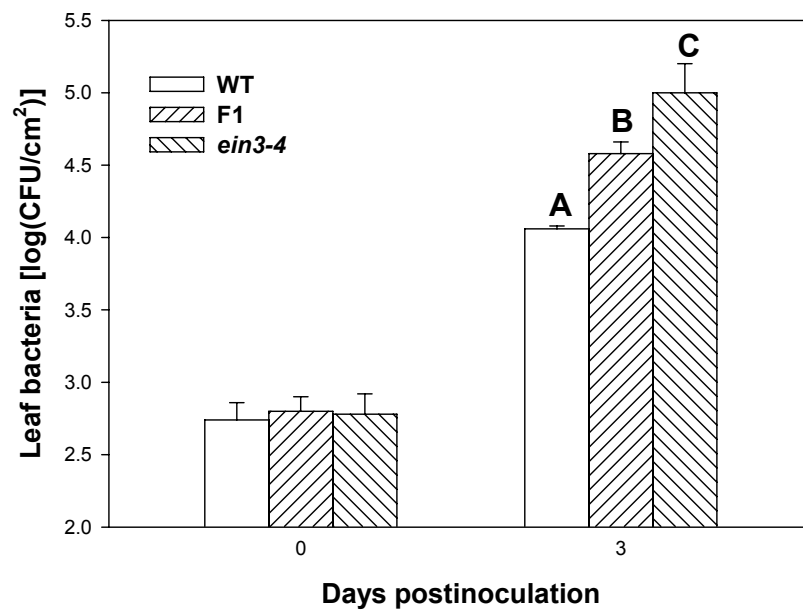

**Supplemental Figure 2.** *ein3-4* Is A Semidominant Mutation that Enhances Disease Susceptibility.

WT *RAP2.6-LUC* transgenic plants, *ein3-4*, and *ein3-4* x WT F1 were infiltrated with  $10^5$  CFU/mL DC3000 (*avrB*) bacteria, and leaf bacterial population was determined at the indicated times. Each data point consisted of three replicates. Error bars indicate standard deviation. Different letters above bars denote significant difference at 0.01 (Student *t* test). The experiment was performed twice with similar results.

Supplemental Data Chen et al., (2009) ETHYLENE INSENSITIVE 3 and ETHYLENE INSENSITIVE 3-LIKE 1 repress *SID2* expression to negatively regulate plant innate immunity in Arabidopsis

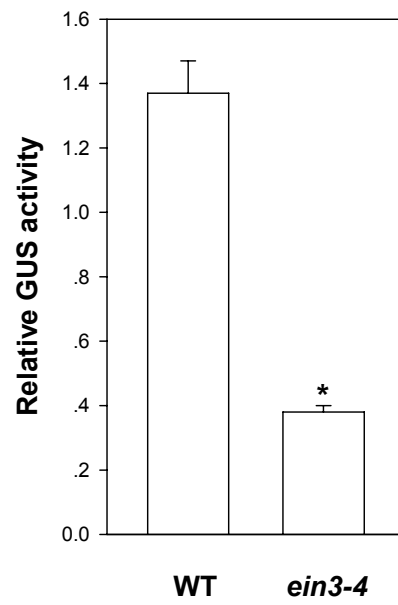

**Supplemental Figure 3.** *ein3-4* Shows Greater Repression of *SID2* Promoter. The *SID2* promoter-*GUS* reporter plasmid was transfected into protoplasts from WT *RAP2.6-LUC* transgenic or *ein3-4* plants, and GUS activity was determined. Each data point consisted of 3 replicates. Error bars indicate standard deviation. \* indicates significant difference at 0.05 between *ein3-4* and WT. The experiment was performed twice with similar results.

Supplemental Data Chen et al., (2009) ETHYLENE INSENSITIVE 3 and ETHYLENE INSENSITIVE 3-LIKE 1 repress *SID2* expression to negatively regulate plant innate immunity in Arabidopsis

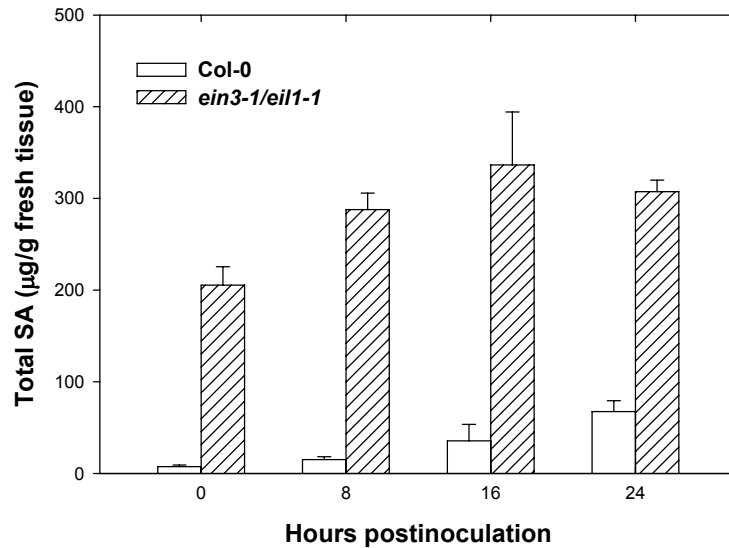

**Supplemental Figure 4.** Total SA Level in *ein3-1/eil1-1* Double Mutant Plants After Bacterial Infection.

Plants were inoculated with DC3000 bacteria ( $10^6$  CFU/mL) for the indicated hrs, and tissues were collected for SA extraction. Each data point consisted of three replicates. Error bars indicate standard deviation. The experiment was repeated twice with similar results.

Supplemental Data Chen et al., (2009) ETHYLENE INSENSITIVE 3 and ETHYLENE INSENSITIVE 3-LIKE 1 repress *SID2* expression to negatively regulate plant innate immunity in Arabidopsis

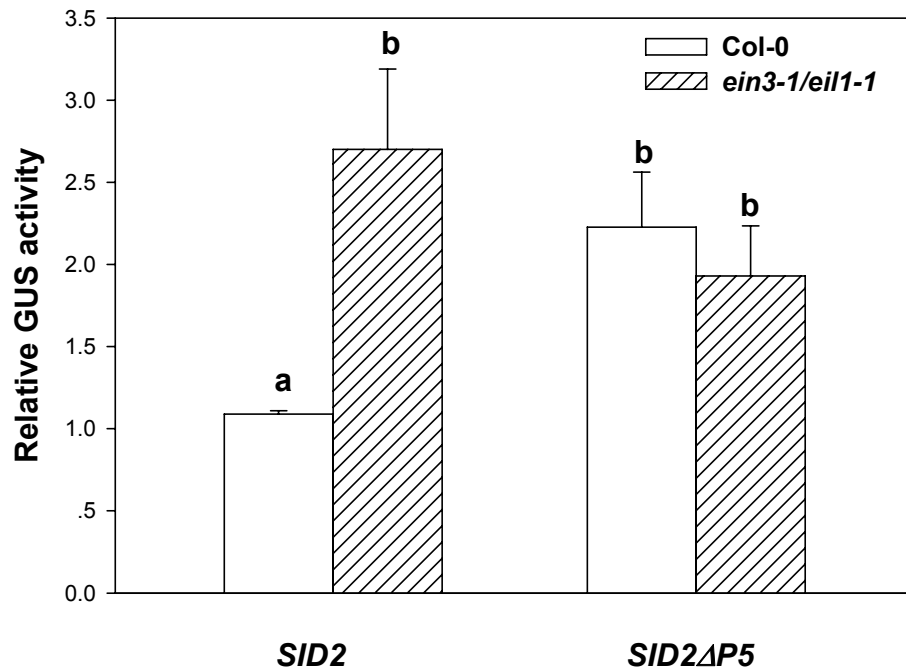

**Supplemental Figure 5.** *SID2* P5 Sequence Contributes to Transcriptional Repression by EIN3 and EIL1. The *SID2-GUS* reporter plasmid and *SID2ΔP5-GUS* construct carrying a 73 bp deletion of the P5 sequence (Fig. 7) were introduced into Col-0 or *ein3-1/eil1-1* protoplasts, and GUS activity was determined. Each data point consisted of 3 replicates. Error bars indicate standard deviation. Different letters denote significant difference at 0.05 (Student *t* test). The experiment was done twice with similar results.

## SUPPLEMENTAL DATA

**Supplemental Table 1.** Complementation Test of *rrb3* and *ein3-1*.

| Genotype                       | Seedlings scored | ACC insensitive | ACC sensitive |
|--------------------------------|------------------|-----------------|---------------|
| <i>rrb3</i> x <i>ein3-1</i> F1 | 23               | 23              | 0             |
| <i>ein3-1</i> x <i>rrb3</i> F1 | 19               | 19              | 0             |
| WT                             | 28               | 0               | 28            |
| <i>rrb3</i>                    | 15               | 15              | 0             |

**Supplemental Table 2.** Quantitative Real-Time RT-PCR Analysis of Genes

Up-Regulated in *ein3-1/eil1-1*.

| Gene      | Protein encoded                           | *Fold increase in <i>ein3-1/eil1-1</i> |
|-----------|-------------------------------------------|----------------------------------------|
| At4g30530 | Putative defense-related protein          | 2.49 ± 0.04                            |
| At4g39940 | Adenosine-5'-phosphosulfate-kinase (AKN2) | 2.89 ± 0.11                            |
| At3g48090 | Enhanced Disease Susceptibility 1 (EDS1)  | 11.89 ± 0.09                           |
| At2g31880 | Leucine rich repeat transmembrane protein | 14.01 ± 1.19                           |
| At3g01830 | calmodulin-related protein                | 41.92 ± 0.53                           |
| At2g42360 | C3HC4-type RING finger family protein     | 90.92 ± 3.77                           |
| At5g13320 | PBS3 ( <i>avrPphB</i> susceptible)        | 155.13 ± 2.14                          |
| At1g02450 | NIM1-Interacting 1 (NIMIN-1)              | 286.69 ± 4.86                          |
| At1g65970 | Thioredoxin-dependent peroxidase 2        | 575.12 ± 4.6                           |

\*Fold change was normalized to the value of WT plants.

**Supplemental Table 3.** Primers Used for Quantitative PCR Analyses..

| Primer name           | Sequence                         | Used for            |
|-----------------------|----------------------------------|---------------------|
| <i>Actin</i> -forward | 5'-GGTGCATGGTTGGTATGGGTC-3'      | Quantitative RT PCR |
| <i>Actin</i> -reverse | 5'-CCTCTGTGAGTAGAACTGGGTGC-3'    | Quantitative RT PCR |
| <i>PR1</i> -forward   | 5'-TACGCAGAACAATAAGAGG-3'        | Quantitative RT PCR |
| <i>PR1</i> -reverse   | 5'-TCGTTACATAATTCCCACG-3'        | Quantitative RT PCR |
| <i>PR2</i> -forward   | 5'-TCGATGAGAATAAGAAGGAACCAAC-3'  | Quantitative RT PCR |
| <i>PR2</i> -reverse   | 5'-ATAACAACATACTACACGCTGAAAG-3'  | Quantitative RT PCR |
| <i>SID2</i> -forward  | 5'-GAGACTTACGAAGGAAGATGATGAG-3'  | Quantitative RT PCR |
| <i>SID2</i> -reverse  | 5'-TGATCCCGACTGCAAATTCCTCTC-3'   | Quantitative RT PCR |
| At4g30530-forward     | 5'-GAAAACCTTACGGAGGATACCACAAC-3' | Quantitative RT PCR |
| At4g30530-reverse     | 5'-AAGGATCCAATCATCTCTCAAAG-3'    | Quantitative RT PCR |
| At4g39940-forward     | 5'-GGTAGTGCTGAAACACACAGGAGAC-3'  | Quantitative RT PCR |
| At4g39940-reverse     | 5'-ATGATAGTGTGACGAAGCGAGAC-3'    | Quantitative RT PCR |

|                               |                                  |                     |
|-------------------------------|----------------------------------|---------------------|
| At3g48090-forward             | 5'-AGGAAAATCGGTAAAGGTGATGTAG-3'  | Quantitative RT PCR |
| At3g48090-reverse             | 5'-CAAGTGCGTGAAGATAGAG-3'        | Quantitative RT PCR |
| At2g31880-forward             | 5'-TGCCAGATGCAGTCACACATATTAC-3'  | Quantitative RT PCR |
| At2g31880-reverse             | 5'-GTTCTCATCCACTTTATCAGACTC-3'   | Quantitative RT PCR |
| At3g01830-forward             | 5'-TTTTCTCTATCTCTCGCTCAAGTC-3'   | Quantitative RT PCR |
| At3g01830-reverse             | 5'-AGCTCCAACGATTTATCATCAGTC-3'   | Quantitative RT PCR |
| At2g42360-forward             | 5'-AGTGGCTTCTTTATCTGGAGTTATC-3'  | Quantitative RT PCR |
| At2g42360-reverse             | 5'-GCCATGACTGTGGGATTGAG-3'       | Quantitative RT PCR |
| At5g13320-forward             | 5'-ACAACCTGTTAGAGGAGATCATCAC-3'  | Quantitative RT PCR |
| At5g13320-reverse             | 5'-TGTGCTCCTCCAGAAGTTCCAG-3'     | Quantitative RT PCR |
| At1g02450-forward             | 5'-TCAATCACTTTCTCTAAATGTATCC-3'  | Quantitative RT PCR |
| At1g02450-reverse             | 5'-TTTCAGCTAACTCTTCTCGTCTAC-3'   | Quantitative RT PCR |
| At1g65970-forward             | 5'-AACTCTTCTATTTTCTCTGTCTTC-3'   | Quantitative RT PCR |
| At1g65970-reverse             | 5'-AAGCACCAGGAACACCAAAG-3'       | Quantitative RT PCR |
| P2-forward                    | 5'-ACTTCTAAAGTCTAGTCC-3'         | Chromatin IP        |
| P2-reverse                    | 5'-TCTTCATTAGATCATTGC-3'         | Chromatin IP        |
| P3-forward                    | 5'-GGTCTCAAAGAGCCTAAG-3'         | Chromatin IP        |
| P3-reverse                    | 5'-CTCTTCTCGTTTGATACG-3'         | Chromatin IP        |
| P4-forward                    | 5'-GAGCATGCGTGTAATGCC-3'         | Chromatin IP        |
| P4-reverse                    | 5'-ACATACAGACCGGATTCG-3'         | Chromatin IP        |
| P5-forward                    | 5'-ATTTCATGAAATATTAATGCACGAC-3'  | Chromatin IP        |
| P5-reverse                    | 5'-GAGATATAAATAGGGACTGATGTAGC-3' | Chromatin IP        |
| <i>SID2</i> intron 2-forward  | 5'-TTTCGTTCTCTAGCTTGCTGTCTTG-3'  | Chromatin IP        |
| <i>SID2</i> intron 2-reverse  | 5'-CCGAGTTCGAGTGTGTGTTTTATTTC-3' | Chromatin IP        |
| <i>Actin</i> promoter-forward | 5'-GATCCTAGTCTTTTAGTGTGCATTC-3'  | Chromatin IP        |
| <i>Actin</i> promoter-reverse | 5'-ATTAAATGATTGATCGGTTTTTCGTG-3' | Chromatin IP        |
| MQC12-forward                 | 5'-AAATCCTCCACCAGCACCACCAC-3'    | Mapping             |
| MQC12-reverse                 | 5'-GTCTCGAGGACCAAAGACATTCTTC-3'  | Mapping             |
| MOE17-forward                 | 5'-ACGATATACTACGGGTGAAATCCTAC-3' | Mapping             |
| MOE17-reverse                 | 5'-GAATGTATTCGTGATTCACAAATGTG-3' | Mapping             |

---
